# Supplementary material for: Influence of functional additives, fillers, and pigments on thermal and catalytic pyrolysis of polyethylene for waste plastic upcycling
Source: Royal Society of Chemistry journal article supplement (doi:10.1039/d5gc00688k), 2025-01-01
Supplement: d5gc00688k1.pdf [file d5gc00688k1.pdf]

## Supplementary Materials for

### **Influence of Functional Additives, Fillers, and Pigments on Thermal and Catalytic Pyrolysis of Polyethylene for Waste Plastics Upcycling**

Harish Radhakrishnan <sup>a</sup>, Abdulrahman ABA Mohammed <sup>a</sup>, Isabel Coffman <sup>a</sup>, Xianglan Bai <sup>a, b\*</sup>

<sup>a</sup> Department of Mechanical Engineering, Iowa State University, Ames, IA 50011, USA

<sup>b</sup> Department of Chemical & Biological Engineering, Iowa State University, Ames, IA 50011,  
USA

\* Corresponding author, [bxl9801@iastate.edu](mailto:bxl9801@iastate.edu)

#### **This PDF file includes:**

Supplementary Text

➤ Additional materials

Tables S1 to S7

## Supplementary Text

### Additional materials

The purity and supplier information for all chemicals are listed below.

- Virgin high-density polyethylene (HDPE) in unstabilized form (DOW Chemicals)
- Kaolin,  $\leq 1\%$  Soluble impurities in acid (Sigma Aldrich #18672)
- Calcium Carbonate,  $\geq 99.0\%$  purity (Fisher Scientific #C64-500)
- Talc,  $\geq 99.0\%$  purity (Fisher Scientific #S25799)
- Barium Sulfate,  $\geq 99.0\%$  purity (Fisher Scientific #S25191A)
- Zinc stearate, purity 14.0% (ZnO) (Fisher Scientific #AA3323818)
- Aluminum trihydrate (ATH), purity 65%  $\text{Al}_2\text{O}_3$ , 34.8%  $\text{H}_2\text{O}$ , 0.15%  $\text{Na}_2\text{O}$  (Fisher Scientific #50-901-09532)
- Titanium dioxide ( $\text{TiO}_2$ ) (as part of LLDPE masterbatches) from a US-based compounder
- Carbon black (as part of LLDPE masterbatches) from a US-based compounder
- Tris(2,4-di-tert-butylphenyl) phosphite (Irgafos 168), purity  $\geq 97.0\%$  (AmBeed #A127499-100g)
- Pentaerythrityl tetrakis(3-(3,5-di-tert-butyl-4-hydroxyphenyl) propionate) (Irganox 1010), purity  $\geq 98.0\%$  (AmBeed #A125422-100g)
- Poly(4-hydroxy-2,2,6,6-tetramethyl-1-piperidine ethanol-alt-1,4-butanedioic acid), purity  $\geq 95.0\%$  (Ambeed #A176835-5g) (Tinuvin 622 LD), purity  $\geq 95.0\%$  (AmBeed #A176835-5g)
- HZSM-5 zeolite catalyst,  $\text{SiO}_2/\text{Al}_2\text{O}_3$  ratio of 23:1 (Zeolyst International #CBV 2314)
- Saturated alkanes ( $\text{C}_7\text{-C}_{40}$ ), certified reference material, 1000  $\mu\text{g/mL}$  each component in hexane (Sigma-Aldrich #49452-U)

- Polar ISO Column Test Mix for Polyarc, Restek reference standard, 250 µg/mL ea. in 1,2-Dichloroethane, 1 mL/ampul (Restek #35103)
- Custom mixed gas standard (He, CO, CO<sub>2</sub>, CH<sub>4</sub>, C<sub>2</sub>H<sub>6</sub>, C<sub>3</sub>H<sub>8</sub>, C<sub>4</sub>H<sub>10</sub>, C<sub>5</sub>H<sub>12</sub>, C<sub>2</sub>H<sub>4</sub>, C<sub>3</sub>H<sub>6</sub>, C<sub>4</sub>H<sub>8</sub>), 99.99% purity, Praxair, USA.
- Acetanilide OAS, pure chemical standard, 5g (EA consumables SKU# B2114)
- Nitric acid (TraceMetal™ Grade), 67 to 70% (HNO<sub>3</sub>, w/w) purity, 2.5L (Fisher Scientific #A509P212)

## Supplementary Tables

**Table S1.** Inorganic elemental composition by ICP-OES for virgin HDPE.

| Analytes | Concentration (ppm) |
|----------|---------------------|
| Sb       | -                   |
| Ba       | -                   |
| Ca       | 22                  |
| Cd       | -                   |
| Cr       | -                   |
| Cu       | -                   |
| Pb       | -                   |
| Mn       | -                   |
| Ni       | -                   |
| Fe       | 7                   |
| Zn       | -                   |
| Co       | -                   |
| Ti*      | 29                  |
| V        | -                   |
| Mo       | -                   |
| Al*      | 132                 |
| Mg       | -                   |
| K        | -                   |
| Na       | -                   |
| Total    | 197                 |

\*The high relative concentrations for Ti and Al are characteristics of a pure Ziegler-Natta HDPE.

**Table S2.** Mass yields from pyrolysis of individual additives alone.

| <b>Additives</b>         | <b>Mass yields (only gases, hydrocarbon liquids, and solid recovery)</b> |               |             |                       |
|--------------------------|--------------------------------------------------------------------------|---------------|-------------|-----------------------|
|                          | <b>C1-C4</b>                                                             | <b>C5-C20</b> | <b>C20+</b> | <b>Solid Recovery</b> |
| Kaolin                   | -                                                                        | -             | -           | 89.7                  |
| Talc                     | -                                                                        | -             | -           | 97.9                  |
| Calcium carbonate        | -                                                                        | -             | -           | 98.7                  |
| Barium sulfate           | -                                                                        | -             | -           | 99.4                  |
| Zinc stearate            | 9.7                                                                      | 18.0          | -           | 13.3                  |
| Aluminum trihydrate      | -                                                                        | -             | -           | 65.7                  |
| Titanium dioxide*        | -                                                                        | -             | -           | 99.9                  |
| Carbon black*            | -                                                                        | -             | -           | 99.5                  |
| Hindered phosphite<br>AO | 10.3                                                                     | 8.3           | -           | 0.6                   |
| Hindered phenol AO       | 17.3                                                                     | -             | -           | 9.3                   |
| Hindered amine LS        | 11.3                                                                     | 19.9          | -           | -                     |
| AOs & LS mix             | 32.9                                                                     | 25.3          | -           | 3.0                   |

\*per pigment basis and does not include LLDPE-masterbatch derived mass or pyrolysates

**Table S3.** Pyrolysis products from pyrolysis of zinc stearate.

| <b>RT (min)</b> | <b>Name</b>                                         | <b>Formula</b>                    |
|-----------------|-----------------------------------------------------|-----------------------------------|
| 4.025           | Propanenitrile                                      | C <sub>3</sub> H <sub>5</sub> N   |
| 4.305           | Cyclobutane, 1,1,2,3,3-pentamethyl-                 | C <sub>9</sub> H <sub>18</sub>    |
| 4.837           | Cyclopentene                                        | C <sub>5</sub> H <sub>8</sub>     |
| 5.1             | 2H-Pyran, 3,4-dihydro-                              | C <sub>5</sub> H <sub>8</sub> O   |
| 6.697           | Cyclopentane, 1,2-dimethyl-, trans-                 | C <sub>7</sub> H <sub>14</sub>    |
| 6.983           | Benzene                                             | C <sub>6</sub> H <sub>6</sub>     |
| 9.174           | Cyclopentane, 1,2,3-trimethyl                       | C <sub>8</sub> H <sub>16</sub>    |
| 9.701           | Toluene                                             | C <sub>7</sub> H <sub>8</sub>     |
| 12.121          | 1-Nonanol                                           | C <sub>9</sub> H <sub>20</sub> O  |
| 15.079          | Cyclopropane, 1-(2-methylbutyl)-1-(1-methylpropyl)- | C <sub>12</sub> H <sub>24</sub>   |
| 17.883          | Cyclodecane, methyl-                                | C <sub>11</sub> H <sub>22</sub>   |
| 20.504          | 1-Dodecanol                                         | C <sub>12</sub> H <sub>26</sub> O |
| 22.896          | Tridecane                                           | C <sub>13</sub> H <sub>28</sub>   |
| 22.947          | n-Tridecan-1-ol                                     | C <sub>13</sub> H <sub>28</sub> O |
| 25.236          | 1-Tetradecanol                                      | C <sub>14</sub> H <sub>30</sub> O |
| 27.33           | Pentadecane                                         | C <sub>15</sub> H <sub>32</sub>   |
| 27.393          | n-Pentadecanol                                      | C <sub>15</sub> H <sub>32</sub> O |
| 27.582          | Cyclopentadecane                                    | C <sub>15</sub> H <sub>30</sub>   |
| 29.419          | 1-Hexadecanol                                       | C <sub>16</sub> H <sub>34</sub> O |
| 31.267          | Heptadecane                                         | C <sub>17</sub> H <sub>36</sub>   |
| 31.336          | 8-Heptadecene                                       | C <sub>17</sub> H <sub>34</sub>   |
| 32.017          | Benzene, decyl-                                     | C <sub>16</sub> H <sub>26</sub>   |
| 35.175          | Hexadecanal                                         | C <sub>16</sub> H <sub>32</sub> O |
| 35.673          | Benzene, dodecyl-                                   | C <sub>18</sub> H <sub>30</sub>   |
| 36.652          | 2-Heptadecanone                                     | C <sub>17</sub> H <sub>34</sub> O |
| 38.471          | 9-Cycloheptadecen-1-ol                              | C <sub>17</sub> H <sub>32</sub> O |
| 39.799          | 2-Nonadecanone                                      | C <sub>19</sub> H <sub>38</sub> O |

**Table S4.** Pyrolysis products from pyrolysis of hindered phosphite additive (Irgafos 168).

| <b>RT (min)</b> | <b>Name</b>                                                 | <b>Formula</b> |
|-----------------|-------------------------------------------------------------|----------------|
| 16.338          | Benzene, tert-butyl-                                        | C10H14         |
| 18.89           | 2-tert-Butyltoluene                                         | C11H16         |
| 20.842          | Benzene, 1-(1,1-dimethylethyl)-3-ethyl-                     | C12H18         |
| 22.913          | Benzene, 1,3-bis(1,1-dimethylethyl)-                        | C14H22         |
| 23.777          | Naphthalene, 1,2,3,4-tetrahydro-1,1,6-trimethyl-            | C13H18         |
| 24.2            | 1H-Indene, 2,3-dihydro-1,1,2,3,3-pentamethyl-               | C14H20         |
| 25.454          | Naphthalene, 1,2,3,4-tetrahydro-1,1,6-trimethyl-            | C13H18         |
| 25.94           | 1H-Inden-1-one, 2,3-dihydro-3,3,6-trimethyl-                | C12H14O        |
| 26.072          | Naphthalene, 1,2,3,4-tetrahydro-1-methyl-8-(1-methylethyl)- | C14H20         |
| 26.615          | 1H-Inden-1-one, 2,3-dihydro-3,3,5,6-tetramethyl-            | C13H16O        |
| 27.233          | Ethanone, 1-(2,4,5-triethylphenyl)-                         | C14H20O        |
| 27.594          | Demethoxyencecalinol                                        | C13H16O2       |
| 27.691          | Phenol, p-tert-butyl-                                       | C10H14O        |
| 28.137          | 1H-Inden-1-one, 2,3-dihydro-3,3,5,6-tetramethyl-            | C13H16O        |
| 28.297          | 1H-Inden-1-one, 2,3-dihydro-3,3,5,6-tetramethyl-            | C13H16O        |
| 28.349          | 2,3,3,4,7-Pentamethyl-2,3-dihydro-benzofuran                | C13H18O        |
| 28.469          | Phenol, 4-(1,1-dimethylethyl)-2-methyl-                     | C11H16O        |
| 29.425          | Phenol, 2-(2-methyl-2-propenyl)-                            | C10H12O        |
| 29.499          | 2,3,3,4,7-Pentamethyl-2,3-dihydro-benzofuran                | C13H18O        |
| 31.456          | 2,4-Di-tert-butylphenol                                     | C14H22O        |
| 32.263          | 1-Indanone, 3,3,5,6,7-pentamethyl-                          | C14H18O        |
| 32.383          | 2,3,3,4,7-Pentamethyl-2,3-dihydro-benzofuran                | C13H18O        |
| 32.429          | 2,3,3,4,7-Pentamethyl-2,3-dihydro-benzofuran                | C13H18O        |
| 32.572          | 4-Butyl-indan-5-ol                                          | C13H18O        |
| 42.282          | Phenol, 2,4-bis(1,1-dimethylethyl)-, phosphite              | C42H63O3P      |

**Table S5.** Pyrolysis products from pyrolysis of hindered phenol additive (Irganox 1010).

| RT (min) | Name                                                                       | Formula                                          |
|----------|----------------------------------------------------------------------------|--------------------------------------------------|
| 21.806   | Phenol                                                                     | C <sub>6</sub> H <sub>6</sub> O                  |
| 22.901   | p-Cresol                                                                   | C <sub>7</sub> H <sub>8</sub> O                  |
| 24.996   | Phenol, 4-ethyl-                                                           | C <sub>8</sub> H <sub>10</sub> O                 |
| 26.02    | Benzene, 1-ethyl-4-methoxy-                                                | C <sub>9</sub> H <sub>12</sub> O                 |
| 26.495   | Phenol, 2-methyl-5-(1-methylethyl)-                                        | C <sub>10</sub> H <sub>14</sub> O                |
| 26.993   | Benzofuran, 2,3-dihydro-                                                   | C <sub>8</sub> H <sub>8</sub> O                  |
| 27.988   | 1H-Inden-5-ol, 2,3-dihydro-                                                | C <sub>9</sub> H <sub>10</sub> O                 |
| 28.057   | Phenol, 2-(1,1-dimethylethyl)-4-methyl-                                    | C <sub>11</sub> H <sub>16</sub> O                |
| 28.337   | Phenol, 2-methyl-6-(2-propenyl)-                                           | C <sub>10</sub> H <sub>12</sub> O                |
| 29.47    | Phenol, 2-(1,1-dimethylethyl)-4-ethyl-                                     | C <sub>12</sub> H <sub>18</sub> O                |
| 29.516   | Butylated Hydroxytoluene                                                   | C <sub>15</sub> H <sub>24</sub> O                |
| 29.636   | Benzamide, 4-methoxy-N-(2-phenylethyl)-N-methyl-                           | C <sub>17</sub> H <sub>19</sub> NO <sub>2</sub>  |
| 29.768   | 1-(benzo[d][1,3]dioxol-4-yl)butan-1-one                                    | C <sub>11</sub> H <sub>12</sub> O <sub>3</sub>   |
| 30.117   | 7-Methylnaphthalen-2-ol, Ac derivative                                     | C <sub>13</sub> H <sub>12</sub> O <sub>2</sub>   |
| 30.432   | Phenol, 2,6-bis(1,1-dimethylethyl)-4-ethyl-                                | C <sub>16</sub> H <sub>26</sub> O                |
| 30.563   | Phenol, 2,4,6-tris(1-methylethyl)-                                         | C <sub>15</sub> H <sub>24</sub> O                |
| 31.479   | Benzofuran, 2,3-dihydro-2,2,4,6-tetramethyl-                               | C <sub>12</sub> H <sub>16</sub> O                |
| 31.605   | 3,5-di-tert-Butyl-4-hydroxybenzaldehyde                                    | C <sub>15</sub> H <sub>22</sub> O <sub>2</sub>   |
| 32.211   | 4-(4-Isopropylphenyl)-5-methyl-1,3-thiazol-2-ylamine                       | C <sub>13</sub> H <sub>16</sub> N <sub>2</sub> S |
| 32.411   | 2-Allyl-1,4-dimethoxy-3-vinyloxymethylbenzene                              | C <sub>14</sub> H <sub>18</sub> O <sub>3</sub>   |
| 33.333   | 7-Ethoxy-3-ethyl-4-methyl-2H-chromen-2-one                                 | C <sub>14</sub> H <sub>16</sub> O <sub>3</sub>   |
| 34.054   | 4-(4-Butylphenyl)-1,3-thiazol-2-amine                                      | C <sub>13</sub> H <sub>16</sub> N <sub>2</sub> S |
| 36.835   | Phenol, 2,6-bis(1,1-dimethylethyl)-                                        | C <sub>14</sub> H <sub>22</sub> O                |
| 37.081   | 4'-Propoxy-2-methylpropiophenone                                           | C <sub>13</sub> H <sub>18</sub> O <sub>2</sub>   |
| 38.128   | Benzenepropanoic acid, 3,5-bis(1,1-dimethylethyl)-4-hydroxy-, methyl ester | C <sub>18</sub> H <sub>28</sub> O <sub>3</sub>   |



**Table S6.** Pyrolysis products from pyrolysis of hindered amine light stabilizer additive (Tinuvin 622 LD).

| RT (min) | Name                                                            | Formula   |
|----------|-----------------------------------------------------------------|-----------|
| 3.95     | 2-Propenal                                                      | C3H4O     |
| 4.482    | Cyclopentene                                                    | C5H8      |
| 4.98     | Cyclopentene, 1-methyl-                                         | C6H10     |
| 5.558    | Cyclopentene, 1-methyl-                                         | C6H10     |
| 5.976    | Cyclopentene, 1-methyl-                                         | C6H10     |
| 6.096    | Cyclopentene, 1-methyl-                                         | C6H10     |
| 6.273    | 1,4-Cyclohexadiene                                              | C6H8      |
| 6.445    | 1-Methyl-1H-1,2,4-triazole                                      | C3H5N3    |
| 6.983    | 3,5-Dimethylcyclopentene                                        | C7H12     |
| 7.984    | 2H-Pyran, 3,6-dihydro-4-methyl-2-(2-methyl-1-propenyl)-         | C10H16O   |
| 10.822   | 1,3-Cyclopentadiene, 5,5-dimethyl-2-ethyl-                      | C9H14     |
| 11.017   | 1,3-Cyclopentadiene, 5,5-dimethyl-2-ethyl-                      | C9H14     |
| 12.012   | Pyridine, 2-methyl-                                             | C6H7N     |
| 12.751   | p-Xylene                                                        | C8H10     |
| 13.037   | 2,4-Heptadiene, 2,6-dimethyl-                                   | C9H16     |
| 13.231   | Cyclopentene, 1,2,3,4,5-pentamethyl-                            | C10H18    |
| 13.374   | 1H-Pyrrole, 4-ethyl-2,3-dimethyl-                               | C8H13N    |
| 13.575   | 2-Methyl-4-pyridinamine 1-oxide                                 | C6H8N2O   |
| 13.632   | Pyridine, 2,3-dimethyl-                                         | C7H9N     |
| 15.074   | 1H-Pyrrole, 3-methyl-                                           | C5H7N     |
| 15.64    | 1H-Pyrrole, 2,3,5-trimethyl-                                    | C7H11N    |
| 15.68    | Pyridine, 3-ethyl-2,6-dimethyl-                                 | C9H13N    |
| 16.127   | 1,3-Cyclopentadiene, 5,5-dimethyl-2-ethyl-                      | C9H14     |
| 16.916   | Pyridine, 2,4,6-trimethyl-                                      | C8H11N    |
| 17.425   | 2-Pyrimidineacetic acid, ethyl ester                            | C8H10N2O2 |
| 21.116   | 2-Isopropyl-6-methylaniline                                     | C10H15N   |
| 23.983   | Succinic anhydride                                              | C4H4O3    |
| 28.091   | 8-Methoxy-[1,2,4]triazolo[4,3-a]pyridine-3-thiol                | C7H7N3OS  |
| 30.907   | 7-((3S,5R,7aS)-5-Propylhexahydro-1H-pyrrolizin-3-yl)heptan-2-ol | C17H33NO  |

**Table S7.** Pyrolysis products from pyrolysis of hindered antioxidants and stabilizer mixture.

| RT (min) | Name                                                                       | Formula                                            |
|----------|----------------------------------------------------------------------------|----------------------------------------------------|
| 3.956    | 2-Propenal                                                                 | C <sub>3</sub> H <sub>4</sub> O                    |
| 5.558    | Cyclopentene, 1-methyl-                                                    | C <sub>6</sub> H <sub>10</sub>                     |
| 5.976    | Cyclopentene, 1-methyl-                                                    | C <sub>6</sub> H <sub>10</sub>                     |
| 6.102    | Cyclopentene, 1-methyl-                                                    | C <sub>6</sub> H <sub>10</sub>                     |
| 10.817   | 1,3-Cyclopentadiene, 5,5-dimethyl-2-ethyl-                                 | C <sub>9</sub> H <sub>14</sub>                     |
| 12.745   | p-Xylene                                                                   | C <sub>8</sub> H <sub>10</sub>                     |
| 13.626   | Pyridine, 2,3-dimethyl-                                                    | C <sub>7</sub> H <sub>9</sub> N                    |
| 23.783   | Naphthalene, 1,2,3,4-tetrahydro-1,1,6-trimethyl-                           | C <sub>13</sub> H <sub>18</sub>                    |
| 24       | Succinic anhydride                                                         | C <sub>4</sub> H <sub>4</sub> O <sub>3</sub>       |
| 24.2     | 1H-Indene, 2,3-dihydro-1,1,2,3,3-pentamethyl-                              | C <sub>14</sub> H <sub>20</sub>                    |
| 26.02    | Benzene, 1-ethyl-4-methoxy-                                                | C <sub>9</sub> H <sub>12</sub> O                   |
| 26.501   | Phenol, 2-methyl-5-(1-methylethyl)-                                        | C <sub>10</sub> H <sub>14</sub> O                  |
| 27.988   | 1H-Inden-5-ol, 2,3-dihydro-                                                | C <sub>9</sub> H <sub>10</sub> O                   |
| 28.063   | Phenol, 2-(1,1-dimethylethyl)-4-methyl-                                    | C <sub>11</sub> H <sub>16</sub> O                  |
| 28.343   | 1-Hexene, 2-(O-anisyl)-4-methyl-                                           | C <sub>14</sub> H <sub>20</sub> O                  |
| 28.463   | Phenol, 4-(1,1-dimethylethyl)-2-methyl-                                    | C <sub>11</sub> H <sub>16</sub> O                  |
| 29.47    | Phenol, 2-(1,1-dimethylethyl)-4-ethyl-                                     | C <sub>12</sub> H <sub>18</sub> O                  |
| 29.51    | Butylated Hydroxytoluene                                                   | C <sub>15</sub> H <sub>24</sub> O                  |
| 29.636   | Benzamide, 4-methoxy-N-(2-phenylethyl)-N-methyl-                           | C <sub>17</sub> H <sub>19</sub> NO <sub>2</sub>    |
| 29.768   | 1-(benzo[d][1,3]dioxol-4-yl)butan-1-one                                    | C <sub>11</sub> H <sub>12</sub> O <sub>3</sub>     |
| 30.432   | Phenol, 2,6-bis(1,1-dimethylethyl)-4-ethyl-                                | C <sub>16</sub> H <sub>26</sub> O                  |
| 30.947   | 2,4-Di-tert-butylphenol                                                    | C <sub>14</sub> H <sub>22</sub> O                  |
| 31.467   | Phenol, 2,5-bis(1,1-dimethylethyl)-                                        | C <sub>14</sub> H <sub>22</sub> O                  |
| 31.605   | 3,5-di-tert-Butyl-4-hydroxybenzaldehyde                                    | C <sub>15</sub> H <sub>22</sub> O <sub>2</sub>     |
| 32.211   | 4-(4-Isopropylphenyl)-5-methyl-1,3-thiazol-2-ylamine                       | C <sub>13</sub> H <sub>16</sub> N <sub>2</sub> S   |
| 32.406   | 2-Allyl-1,4-dimethoxy-3-vinyloxymethylbenzene                              | C <sub>14</sub> H <sub>18</sub> O <sub>3</sub>     |
| 33.333   | 7-Ethoxy-3-ethyl-4-methyl-2H-chromen-2-one                                 | C <sub>14</sub> H <sub>16</sub> O <sub>3</sub>     |
| 34.054   | 4-(4-Butylphenyl)-1,3-thiazol-2-amine                                      | C <sub>13</sub> H <sub>16</sub> N <sub>2</sub> S   |
| 38.128   | Benzenepropanoic acid, 3,5-bis(1,1-dimethylethyl)-4-hydroxy-, methyl ester | C <sub>18</sub> H <sub>28</sub> O <sub>3</sub>     |
| 39.095   | 2-(2-Trimethylsilyloxy-5-methylphenyl)benzotriazole                        | C <sub>16</sub> H <sub>19</sub> N <sub>3</sub> OSi |
| 42.576   | Phenol, 2,4-bis(1,1-dimethylethyl)-, phosphite (3:1)                       | C <sub>42</sub> H <sub>63</sub> O <sub>3</sub> P   |
